# Supplementary material
Source: publisher figshare collection journal article supplement (https://tandf.figshare.com/articles/dataset/_/8945144)
Supplement: Supplementary file 1 [file 1]

## **Guiding questions for the focus groups moderator**

### **Students' focus group**

- 1) In recent years, you have participated as student in an interprofessional project. How did you experience your work in the project?
- 2) What was your personal motivation to work in the interprofessional project?
- 3) Please describe the cooperation with the other status groups and professional groups.
- 4) How did you experience the cooperation with the other students?
- 5) What was your role in the project group?
- 6) Where there difficult situations in collaboration, and how did you handle them?
- 7) Which factors helped you to work in the interprofessional project?
- 8) What was surprising / unexpected when working together in the group? What was your personal benefit from working in the interprofessional project?
- 9) How do you rate your own influence on the results of the project?

### **Faculty members' focus group**

- 1) In recent years, you have worked in an interprofessional project with participating students. How did you experience the collaboration with the students in the project?
- 2) Please describe your attitude towards student participation at the beginning of the project. Did it change in the course of the project?
- 3) How did you experience the collaboration between the different status groups and professional groups?
- 4) Please think about the students. How did you perceive their motivation to work in the project? Which goals did they pose for the project?
- 5) How did you experience the role of students during the collaboration?
- 6) Where there difficult situations in collaboration? If so, how did the students handle them?
- 7) Please think about the students. What do you think was particularly difficult for the students in the collaboration in the project? What do you think helped them?
- 8) What was surprising / unexpected when working together in the interprofessional group?
- 9) How do you rate the influence of student on the results of the project?
- 10) What advantages do you see for the participating of the student in the project?
