# Supplementary material
Source: publisher figshare collection journal article supplement (https://tandf.figshare.com/articles/dataset/_/8945144)
Supplement: Supplementary file 2 [file 1]

Archive with 2 entries (2 files):
- CTME_2019_0010R1_Appendix_A_10July2019.pdf
- CTME_2019_0010R1_Appendix_B_10July2019.pdf
